# Supplementary material for: In Vitro Evaluation of Probiotic Properties of Lactic Acid Bacteria Isolated from Some Traditionally Fermented Ethiopian Food Products
Source: PubMed Central journal article supplement (PMC6732631; doi:10.1155/2019/7179514), 2019-08-25
Supplement: 7179514.f1.pdf [file 7179514.f1.pdf]

| Number | Isolates code | KOH test | Remark | Catalase test | Remark    | Spore staining |
|--------|---------------|----------|--------|---------------|-----------|----------------|
| 1.     | T031          | -ve      |        | -ve           | Passed    | -ve            |
| 2.     | T032          | +ve      |        | +ve           | Discarded | -              |
| 3.     | T033          | -ve      |        | -ve           | Passed    | -ve            |
| 4.     | T034          | -ve      |        | -ve           | Passed    | -ve            |
| 5.     | T035          | -ve      |        | -ve           | Passed    | -ve            |
| 6.     | T036          | +ve      |        | +ve           | Discarded | -              |
| 7.     | T037          | +ve      |        | +ve           | Discarded | -              |
| 8.     | T038          | +ve      |        | +ve           | Discarded | -              |
| 9.     | T039          | -ve      |        | -ve           | Passed    | -ve            |
| 10.    | T040          | -ve      |        | -ve           | Passed    | -ve            |
| 11.    | T041          | -ve      |        | -ve           | Passed    | -ve            |
| 12.    | T042          | -ve      |        | -ve           | Passed    | -ve            |
| 13.    | T043          | -ve      |        | -ve           | Passed    | -ve            |
| 14.    | T044          | +ve      |        | +ve           | Discarded | -              |
| 15.    | T045          | +ve      |        | +ve           | Discarded | -              |
| 16.    | T046          | +ve      |        | +ve           | Discarded | -              |
| 17.    | T047          | -ve      |        | -ve           | Passed    | -ve            |
| 18.    | T048          | -ve      |        | -ve           | Passed    | -ve            |
| 19.    | T049          | -ve      |        | -ve           | Passed    | -ve            |
| 20.    | T050          | -ve      |        | -ve           | Passed    | -ve            |
| 21.    | T051          | -ve      |        | -ve           | Passed    | -ve            |
| 22.    | T052          | -ve      |        | -ve           | Passed    | -ve            |
| 23.    | T053          | -ve      |        | -ve           | Passed    | -ve            |
| 24.    | T054          | -ve      |        | -ve           | Passed    | -ve            |
| 25.    | T055          | -ve      |        | -ve           | Passed    | -ve            |
| 26.    | T056          | +ve      |        | +ve           | Discarded | -              |
| 27.    | T057          | -ve      |        | -ve           | Passed    | -ve            |
| 28.    | T058          | -ve      |        | -ve           | Passed    | -ve            |
| 29.    | T059          | +ve      |        | +ve           | Discarded | -              |
| 30.    | T060          | +ve      |        | +ve           | Discarded | -              |
| 31.    | E031          | -ve      |        | -ve           | Passed    | -ve            |
| 32.    | E032          | -ve      |        | -ve           | Passed    | -ve            |
| 33.    | E033          | -ve      |        | -ve           | Passed    | -ve            |
| 34.    | E034          | +ve      |        | +ve           | Discarded | -              |
| 35.    | E035          | +ve      |        | +ve           | Discarded | -              |
| 36.    | E036          | -ve      |        | -ve           | Passed    | -ve            |
| 37.    | E037          | -ve      |        | -ve           | Passed    | -ve            |
| 38.    | E038          | +ve      |        | +ve           | Discarded | -              |
| 39.    | E039          | -ve      |        | -ve           | Passed    | -ve            |
| 40.    | E040          | -ve      |        | -ve           | Passed    | -ve            |
| 41.    | E041          | +ve      |        | +ve           | Discarded | -              |
| 42.    | E042          | +ve      |        | +ve           | Discarded | -              |
| 43.    | E043          | +ve      |        | +ve           | Discarded | -              |
| 44.    | E044          | +ve      |        | +ve           | Discarded | -              |
| 45.    | E045          | -ve      |        | -ve           | Passed    | -ve            |
| 46.    | E046          | -ve      |        | -ve           | Passed    | -ve            |
| 47.    | E047          | -ve      |        | -ve           | Passed    | -ve            |

|              |                                                                                             |     |  |     |           |     |
|--------------|---------------------------------------------------------------------------------------------|-----|--|-----|-----------|-----|
| 48.          | E048                                                                                        | -ve |  | -ve | Passed    | -ve |
| 49.          | E049                                                                                        | +ve |  | +ve | Discarded | -   |
| 50.          | E050                                                                                        | -ve |  | -ve | Passed    | -ve |
| 51.          | E051                                                                                        | -ve |  | -ve | Passed    | -ve |
| 52.          | E052                                                                                        | -ve |  | -ve | Passed    | -ve |
| 53.          | E053                                                                                        | -ve |  | -ve | Passed    | -ve |
| 54.          | E054                                                                                        | +ve |  | +ve | Discarded | -   |
| 55.          | E055                                                                                        | -ve |  | -ve | Passed    | -   |
| 56.          | E056                                                                                        | +ve |  | +ve | Discarded | -   |
| 57.          | E057                                                                                        | -ve |  | -ve | Passed    | -ve |
| 58.          | E058                                                                                        | -ve |  | -ve | Passed    | -ve |
| 59.          | E059                                                                                        | +ve |  | +ve | Discarded | -   |
| 60.          | E060                                                                                        | -ve |  | -ve | Passed    | -ve |
| 61.          | K011                                                                                        | -ve |  | -ve | Passed    | -ve |
| 62.          | K012                                                                                        | -ve |  | -ve | Passed    | -ve |
| 63.          | K013                                                                                        | -ve |  | -ve | Passed    | -ve |
| 64.          | K014                                                                                        | +ve |  | +ve | Discarded | -   |
| 65.          | K015                                                                                        | +ve |  | +ve | Discarded | -   |
| 66.          | K016                                                                                        | +ve |  | +ve | Discarded | -   |
| 67.          | K017                                                                                        | +ve |  | +ve | Discarded | -   |
| 68.          | K018                                                                                        | -ve |  | -ve | Passed    | -ve |
| 69.          | K019                                                                                        | -ve |  | -ve | Passed    | -ve |
| 70.          | K020                                                                                        | +ve |  | +ve | Discarded | -   |
| 71.          | K021                                                                                        | -ve |  | -ve | Passed    | -ve |
| 72.          | K022                                                                                        | -ve |  | -ve | Passed    | -ve |
| 73.          | K023                                                                                        | +ve |  | +ve | Discarded | -   |
| 74.          | K024                                                                                        | -ve |  | -ve | Passed    | -ve |
| 75.          | K025                                                                                        | -ve |  | -ve | Passed    | -ve |
| 76.          | K026                                                                                        | -ve |  | -ve | Passed    | -ve |
| 77.          | K027                                                                                        | +ve |  | +ve | Discarded | -   |
| 78.          | K028                                                                                        | +ve |  | +ve | Discarded | -   |
| 79.          | K029                                                                                        | -ve |  | -ve | Passed    | -ve |
| 80.          | K030                                                                                        | -ve |  | -ve | Passed    | -ve |
| 81.          | K031                                                                                        | -ve |  | -ve | Passed    | -ve |
| 82.          | K032                                                                                        | +ve |  | +ve | Discarded | -   |
| 83.          | K033                                                                                        | -ve |  | -ve | Passed    | -ve |
| 84.          | K034                                                                                        | -ve |  | -ve | Passed    | -ve |
| 85.          | K035                                                                                        | +ve |  | +ve | Discarded | -   |
| 86.          | K036                                                                                        | -ve |  | -ve | Passed    | -ve |
| 87.          | K037                                                                                        | -ve |  | -ve | Passed    | -ve |
| 88.          | K038                                                                                        | +ve |  | +ve | Discarded | -   |
| 89.          | K039                                                                                        | +ve |  | +ve | Discarded | -   |
| 90.          | K030                                                                                        | +ve |  | +ve | Discarded | -   |
| <b>Total</b> | <b>56/90 isolates were passed for the next step, whereas, 34/90 isolates were discarded</b> |     |  |     |           |     |

This table shows the isolation of lactic acid bacteria from Ethiopian fermented foods. This is copied from the excel
